# Supplementary material
Source: PubMed Central journal article supplement (PMC2629274)
Supplement: 0810773105_0810773105SI.pdf [file 0810773105_0810773105SI.pdf]

# Supporting Information

Zhou et al. 10.1073/pnas.0810773105

## SI Materials and Methods

**Animals.** Murine embryonic stem cells (ES cells) bearing a gene trap insertion between the first and second exons of the *stk4/Mst1* gene (cell line AJO315) were obtained from the Sanger Institute gene-trap resource center (<http://www.sanger.ac.uk/PostGenomics/genetrap/>), also accessed via (<http://www.genetrap.org/>). The insertion of the gene trap vector was mapped by PCR and confirmed by sequencing and Southern blot, as shown in Fig. 1A. The absence of additional insertions was established by the presence of a single band on a Southern blot developed with a probe generated entirely from within the gene trap vector (not shown). The heterozygous ES cells were injected into C57BL/6J blastocysts to produce chimeric mice by using standard methods. Resulting chimaeras were mated with C57Bl6/J mice to produce *Mst1* mutant heterozygous mice. Heterozygous mice were backcrossed onto the C57Bl6/J strain for six generations. All comparisons were done using homozygous and wild-type littermate controls. All mice were housed in a temperature-controlled room at 22–24°C with a 12-h light/dark cycle and fed a standard laboratory chow diet and double-distilled water. Animal experiments were carried out in accordance with National Institutes of Health (NIH) guidelines for the Care and Use of Experimental Animals and were approved by the institutional Animal Care and Use committee of the Massachusetts General Hospital.

**Mice Genotyping.** Genomic DNA extracted from tail (postnatal 3–4 weeks) biopsies was screened for the presence of wild-type and mutant alleles by PCR. One forward primer based on the *Mst1* genome sequence (primer a: 5'-GGG TCT TGC ACA GTG TCT CA -3') is common for both wild-type and targeted alleles. Two reverse primers based on the *Mst1* genome sequence (primer b: 5'-TGT CAA GCT CAT GAC TGC A -3') and the targeting vector (primer c: GGGATGTGCTGCAAGGCGA) were used for PCR to amplify 500- and 250-bp DNA fragments specifically for the wild-type and targeted alleles, respectively. The genotypes were confirmed by Southern blotting. Briefly, Southern blots of *Bam*H I-digested DNA probed with 5' probe give rise to a wild-type 10-kb band or a disrupted 8-kb band. 5' probe was amplified by the forward primer, GGG AAG GCT TGT GTT GAA T and reverse primer, TAG GGC GCA GTC AAG AAA C.

**Northern Blot Analysis.** Total RNA was extracted from  $5 \times 10^6$  cells with TRIzol (Invitrogen). Twenty micrograms RNA was separated by electrophoresis in 2% denaturing formaldehyde-agarose gels and transferred to a nylon membrane (Hybond N+, Amersham). RNA was cross-linked to the membranes by UV light. After prehybridization, the membrane was hybridized with the cDNA probes for Nore1B, labeled with  $^{32}$ P by using a random primer DNA labeling kit (Qiagen). The probed membrane was then washed and exposed to radiographic film. Full-length Nore1B cDNA fragments were used as probes for Northern blot assay. The same membrane was reprobbed with the *Mst1* probe. The *Mst1* probe was amplified by PCR using the primers as follows: *Mst1* forward, CAC CCG TTT GTT AAG AGT G; reverse, TCA ATG GCA TCC AGG ATT GGC.

**Cell Isolation and Stimulation.** Single cell suspensions of thymus, spleen, and peripheral lymph nodes of *Mst1*-null and wild-type littermate control mice were made by disrupting the organs and then filtering them through 70- $\mu$ m filters. Red blood cells were

depleted by red cell lysis solution containing 0.15 M  $\text{NH}_4\text{Cl}$ , 10 mM  $\text{KHCO}_3$ , and 0.1 mM  $\text{Na}_2\text{EDTA}$ . Total T cells were purified by CD90 microbeads, and naive and memory T cell were isolated using the  $\text{CD4}^+\text{CD62L}^+$  T Cell Isolation Kit II (Miltenyi Biotec) according to the manufacturer's protocol. The overall purity of total T cells and the  $\text{CD4}^+\text{CD62L}^+$  subset was verified by cytofluorimetry always to be higher than 90 usually 95%. Before TCR stimulation, the cells were rested at 37°C for 2 to 3 h in RPMI 1640 complete medium containing 10% FBS, 25 mM Hepes, 2 mM L-glutamine, 50  $\mu\text{M}$  2-mercaptoethanol (2-ME), 1% non-essential amino acid, and 2 mM sodium pyruvate. For the immunoblot studies shown in Fig. 5, two million purified T cells were incubated with 10  $\mu\text{g}/\text{ml}$  anti-CD3 antibody and 10  $\mu\text{g}/\text{ml}$  anti-CD28 antibody (clone 37.51, BD PharMingen) at 37°C for indicated time points. The cells were quickly spun down and washed with cold PBS once, then frozen on dry ice ready for immunoblot analysis. Following the same procedure, T cells were treated with either 50 ng/ml PMA (Sigma) and 1  $\mu\text{M}$  Ionomycin (Sigma) or 0.5 mM  $\text{H}_2\text{O}_2$  (Sigma).

**Flow Cytometry.** Single cell suspensions of spleen or lymph node were resuspended in PBS with 1% BSA and blocked with CD16/CD32 (Fc $\gamma$  III/II Receptor) (BD PharMingen). The cells were then stained with the indicated antibodies, washed, and then fixed with paraformaldehyde. The lungs were flushed with cold PBS and excised. Single cell suspensions were obtained by disrupting the tissue with scissors followed by digestion in Blendzyme (Roche) and DNase for 45 min at 37°C and strained through a 70-mm filter. After lysis of red blood cells (RBC lysis buffer, Sigma), the cells were resuspended, counted, and stained for flow cytometry as above.

Antibodies were obtained from BD PharMingen. In some cases, the cells were permeabilized and stained with an antibody to murine Foxp3 (eBiosciences) according to the manufacturer's protocol. Flow cytometry was performed on a BD FACScaliber and analyzed with Flowjo software (Treestar).

**Ca $^{2+}$  Flux Measurements.** Five million lymphocytes isolated from mice 8 weeks of age were loaded with 5  $\mu\text{g}/\text{ml}$  Fluo4 A.M. (reconstituted in anhydrous DMSO for a working concentration of 1 mg/ml; Molecular Probes/Invitrogen) for 30 min at 37°C with occasional mixing. The cells were washed briefly in complete media (IMDM containing 10% FCS+ $\text{Fe}^{+2}$ , 100  $\mu\text{M}$   $\beta$ -mercaptoethanol, and 50  $\mu\text{g}/\text{ml}$  gentamicin) and were then stained with antibodies against CD4 and CD62L (BD Biosciences) for 10 min at room temperature. Cells were then washed and resuspended in complete medium, and then analyzed by flow cytometry (Becton Dickinson FACScaliber machine and CellQuest Pro software, version 5.2).  $\text{CD4}^+$  cell populations or  $\text{CD4}^+\text{CD62L}^+$  cell populations were gated as indicated in Fig. S11B. Gated, unstimulated cells were collected for 30 s to establish a baseline reading, and were then stimulated with the addition of 2  $\mu\text{g}$  of anti-CD3 (BD Biosciences), immediately followed by cross-linking with 5  $\mu\text{g}$  of goat anti-Armenian hamster antibodies (Jackson ImmunoResearch). Ca + 2 fluxes were measured for eight minutes, followed by the addition of 0.5  $\mu\text{g}/\text{ml}$  ionomycin (Sigma) for an additional 30 s. As indicated by the overlay in panel Y, lymphocytes from both wild-type (blue) and *Mst1*-deficient mice (red) had similar Ca $^{2+}$  flux and response to the positive control (ionomycin). Data shown is representative of two independent experiments.

**Immunoblotting.** Cells were lysed in ice-cold lysis buffer containing 1% Triton X-100, 50 mM Tris-HCl (pH 7.4), 10% glycerol, 150 mM NaCl, 2 mM EDTA, 50 mM NaF, 10 mM Na<sub>3</sub>VO<sub>4</sub>, complete Mini protease inhibitor mixture tablet (Roche), and 2 mM PMSF. After centrifugation, cell lysates from  $1 \times 10^6$  were subjected to SDS-polyacrylamide gel electrophoresis and transferred to a PVDF membrane. The blot was incubated with indicated antibodies and visualized by the ECL detection system (Amersham Pharmacia).

The following antibodies are used for immunoblot: anti-total or phospho-ERK(Thr-202/Tyr-204,197G2), Jnk(Thr-183/Tyr-185), p38(Thr-180/Tyr-182), Akt (Ser-473,193H12), IKB  $\alpha$ (Ser-32,14D4), PLC $\gamma$ (Tyr-783), ZAP 70(Tyr-319), Lck(Tyr-505), YAP(Ser-127), and PAK1(Thr-423)/PAK2(Thr-402) are purchased from Cell Signaling Technology; Anti-CD3 (clone 145-2C11) and anti-CD28 (clone 37.51) are obtained from BD PharMingen; anti-phospho-FOXO1(Ser 212)/FOXO3(Ser 207) and anti-Actin are from Invitrogen and Sigma, respectively; anti-phospho-Tyrosine(pY, 4G10) was from Upstate; anti-Actin anti-phospho-Mob1(Thr-12), anti-phospho-Mob1(Thr 35), anti-Lats1, anti-phospho-Lats1/2 C-terminal (CT), anti-phospho-Lats1/2 activation loop (AL), anti-Mst1, anti-Mst2 and anti-phospho-Mst1/2(Thr-183/180) are described before (S1,S2).

**Immunofluorescence Staining.** Immunofluorescence staining of splenic sections was performed essentially according to Cariappa *et al.*, (S3) with minor modifications. Spleens were harvested and immediately frozen in OCT compound (Tissue-Tek). Six- $\mu$ m thick sections were cut and stored at -80°C until use. All subsequent manipulations were done at room temperature. Sections were air dried for overnight, fixed in ice-cold acetone for 10 min, air dried briefly, blocked with 5% normal horse serum for 20 min, and incubate with biotin-anti-mouse IgM (R6-60.2, BD PharMingen) at 1:50 dilution for 1 h. After rinsed in PBS (three times, 5 min each), sections were then stained with a 1:500 dilution of streptavidin-Texas red (Jackson Immuno-research Laboratories) and anti-MOMA-1-FITC (Serotec) for 1 h. Sections were rinsed in PBS (three times, 5 min each), and mounted with mounting medium (Vectashield). Digital images were acquired by using a Nikon Eclipse 800 epifluorescence microscope (Nikon Instruments) equipped with an Orca 100 CCD camera (Hamamatsu). Epifluorescence images were analyzed using IPLab version 3.2.4 image processing software (Scanalytics) and imported into Adobe Photoshop v7.0 (Adobe Systems) for production of the final figures.

T cell staining was performed as previously described (S4). Briefly, purified T cells were fixed with 4% PFA for 15 min at room temperature. Fixed cells were mounted on polyL-lysine-coated slides. Fixed cells were permeabilized for 5 min with 0.2% Triton X-100, and then blocked with 10% goat serum for 20 min. Cells were stained with antibody to LFA-1 a(M17/4, BD PharMingen) at 1:50 dilution for one and half an hour followed by Texas Red-conjugated goat antibody to Rat IgG (Jackson Immuno-research Laboratories) at 1:500 dilution for 45 min. Unbound antibodies were removed by five washes with PBS plus 0.1% BSA. Stained cells were viewed by Nikon Eclipse 800 epifluorescence microscope.

**Annexin V Assay.** Annexin V staining was done after initial staining with anti-CD3 (PharMingen) and anti-CD62L with an annexin V staining kit (PharMingen). Cells were subsequently analyzed by flow cytometry on a FACScaliber.

**Gene Expression Analysis and Real-time Quantitative PCR.** CD4<sup>+</sup> cells were immunisolated and the CD4/CD62L<sup>hi</sup> and CD4/CD62L<sup>lo</sup> subsets were then purified by cell sorting. These cells and the excised mouse tissues were homogenized in TRIzol reagent (Invitrogen). After extraction with chloroform, the RNA was

purified using RNeasy mini kit (Qiagen) and reverse transcribed using SuperScript III RT (Invitrogen). Real-time quantitative PCR was performed using Bio-Rad iQ SYBR Green Supermix in the BioRad iCycler iQ system (BioRad).  $\beta$ -actin RNA was used to standardize the total amount of cDNA. The sequence of primers was used as follows: Mst1 se:GGA AGC TTC CTC GCA ACT TTG; Mst1 as:GCT CAG GTG ACC TTC CCT GAA; CD25 se:AGA ACA CCA CCG ATT TCT GG; CD25 as:CTG TGG GTT GTG GGA AGT CT; CD4 se:CAC CTG GAA GTT CTC TGA CCA; CD4 as:AAA CGA TCA AAC TGC GAA GG; CD28 se:TGG CTT GCT AGT GAC AGT GG; CD28 as:GCT GGT AAG GCT TTC GAG TG; CD62L se:AAG CTG TGG GTC TGG ACA CT; CD62L as:AGC ATT TTC CCA GTT CAT GG; KLF2 se:AAC TGC GGC AAG ACC TAC AC; KLF2 as:TCC TTC CCA GTT GCA ATG AT; b7-integrin se:GGA CGA CTT GGA ACG TGT G; b7-integrin as:CGT TTT GTC CAC GAA GGA G; S1P1 se:GTG TAG ACC CAG AGT CCT GCG; S1P1 as:AGC TTT TCC TTG GCT GGA GAG;  $\beta$ -actin se:AAA TCG TGC GTG ACA TCA AA;  $\beta$ -actin as:TCT CCA GGG AGG AAG AGG AT. Other primers are as described in (S5). PCR specificity was examined by analyzing the melting-curves. Relative mRNA levels in Fig. 3D were determined by comparing the PCR cycle threshold between cDNA of CD25, Mst1, or CD4 and that of  $\beta$ -actin.

**Assay of [<sup>3</sup>H]-Thymidine Incorporation and Cytokine Production in Vitro.** Two hundred  $\mu$ l of purified T cells at a concentration of  $1 \times 10^6$  cells/ml in RPMI 1640 complete medium were added to 96-well plates pre-coated with 1  $\mu$ g/ml of anti-CD3 with or without 1  $\mu$ g/ml anti-CD28 antibody. Cells were cultured for 24 to 120 h at 37°C and pulsed with 1  $\mu$ Ci of [<sup>3</sup>H]-thymidine/well for the final 10–12 h of culture. The plates were harvested using a Packard 96-well Filtermate Harvester and counted on a Packard Top Count Scintillation counter. Supernatants from day 1 and day 2 were taken for cytokine ELISA. IL-2, IL-4, and IFN- $\gamma$  were done using ELISA Kits (BD Biosciences) according to the manufacturer's directions.

**CFSE Labeling.** CD3<sup>+</sup> T cells ( $2 \times 10^6$  cells/ml) were incubated with 5 mM CFSE in PBS containing 5% FBS for 10 min at 37°C. Unbound CFSE was quenched by using an excess of complete medium and incubation on ice for 5 min. Cells were washed three times in complete medium before cell culture. Analyses of CFSE profiles were performed on a FACS Calibur flow cytometer by using CellQuest software by gating on viable CD3<sup>+</sup> T cells.

**Generation of Th1 and Th2 CD4<sup>+</sup> T Cells in Vitro.** Naïve CD4<sup>+</sup> T cells were isolated from spleen and pooled cervical, axillary and inguinal lymph nodes from Mst1<sup>-/-</sup> and wild-type mice using a magnetic bead selection kit for CD4<sup>+</sup>/CD62L<sup>+</sup> cells (Miltenyi). Purified CD4<sup>+</sup> T cells ( $1 \times 10^6$  cells/ml) were activated in the presence of  $\alpha$ -CD3 (2 mg/ml; 2C11) and  $\alpha$ -CD28 (1 mg/ml; both from BD PharMingen). Th1 cells were generated by activation of cells in the presence of 100 U/ml IL-12 (PeproTech) and anti-IL-4 (BD PharMingen) at inhibitory concentrations. Th2 cells were generated by activation of cells in the presence of 1,000 U/ml IL-4 (PeproTech) and  $\alpha$ -IFN- $\gamma$  (BD PharMingen) at inhibitory concentrations. Media with 5–10 U/ml IL-2 (PeproTech) was added to the cells on day 2, and the cells were then split every day and used after 6 days in culture. Cytokine expression by intracytoplasmic staining was assayed by cytofluorimetry as in (S6 and S7).

**Cell Adhesion Assay.** Adhesion assays were done as described before (S8). Recombinant mouse ICAM-1 human IgG1 Fc was used to coat Nunc Maxi-Sorp 96-well plates. After blocking with 1% BSA, resuspended cells  $5 \times 10^6$  in RPMI were labeled with 5  $\mu$ M Calcein-acetoxymethyl Ester Diacetate (Calcein AM,

Calbiochem) and incubated at 37°C for 30 min. Labeled cells were washed twice with prewarmed RPMI and resuspended at  $1 \times 10^6$  cells/ml. Fifty microliters of cell suspension per well was transferred to the coated plate in the presence of PMA (10 ng/ml), 2C11 (10  $\mu$ g/ml), SLC (100 ng/ml), or no stimulus, then were incubated at 37°C for 30 min. Non-adherent cells were removed by four consecutive washes. Input and bound cells were measured in the 96-well plate using a fluorescence multiwell plate reader (Cytofluor4000; Applied Biosystems). The data are presented by the percentage of the number of bound to input cells.

**Chemotaxis Assays.** Chemotaxis assays using 24-well transwells (Costar; Corning) were performed as previously described (S9). Briefly, 0.5 ml of RPMI medium 1640 containing 200 ng/ml SLC/CCL21 was added to the lower chamber. One million splenic T cells in 150  $\mu$ l of media were then added to the upper chamber of the transwell and incubated for 3 h at 37°C in 5% CO<sub>2</sub>. The percentage of migration was calculated by dividing the number of cells in the lower chamber by the total cell input (one million), multiplying by 100. All chemotaxis data represent the average of triplicate well, done in duplicate experiments.

1. Praskova M, Khoklatchev A, Ortiz-Vega S, Avruch J (2004) Regulation of the MST1 kinase by autophosphorylation, by the growth inhibitory proteins, RASSF1 and NORE1, and by Ras. *Biochem J* 381:453–462.
2. Praskova M, Xia F, Avruch J (2008) MOBKL1A/MOBKL1B phosphorylation by MST1 and MST2 inhibits cell proliferation. *Curr Biol* 18:311–321.
3. Cariappa A, Liou HC, Horwitz BH, Pillai S (2000) Nuclear factor kappa B is required for the development of marginal zone B lymphocytes. *J Exp Med* 192:1175–1182.
4. Katagiri K, Maeda A, Shimonaka M, Kinashi T (2003) RAPL, a Rap1-binding molecule that mediates Rap1-induced adhesion through spatial regulation of LFA-1. *Nat Immunol* 4:741–748.
5. Sebzda E, Zou Z, Lee JS, Wang T, Kahn ML (2008) Transcription factor KLF2 regulates the migration of naive T cells by restricting chemokine receptor expression patterns. *Nat Immunol* 9:292–300.
6. Tager AM, et al. (2003) Leukotriene B4 receptor BLT1 mediates early effector T cell recruitment. *Nat Immunol* 4:982–990.
7. Bird JJ, et al. (1998) Helper T cell differentiation is controlled by the cell cycle. *Immunity* 9:229–237.
8. Christopherson KW 2nd, Campbell JJ, Travers JB, Hromas RA (2002) Low-molecular-weight heparins inhibit CCL21-induced T cell adhesion and migration. *J Pharmacol Exp Ther* 302:290–295.
9. Li L, et al. (2005) Rap1-GTP is a negative regulator of Th cell function and promotes the generation of CD4+CD103+ regulatory T cells in vivo. *J Immunol* 175:3133–3139.
10. Carsetti R (2004) in *Methods in Molecular Biology*, Vol. 271: B cell protocols, eds Gu H, Rajewsky K (Humana Press), pp 25–33.















Spleen

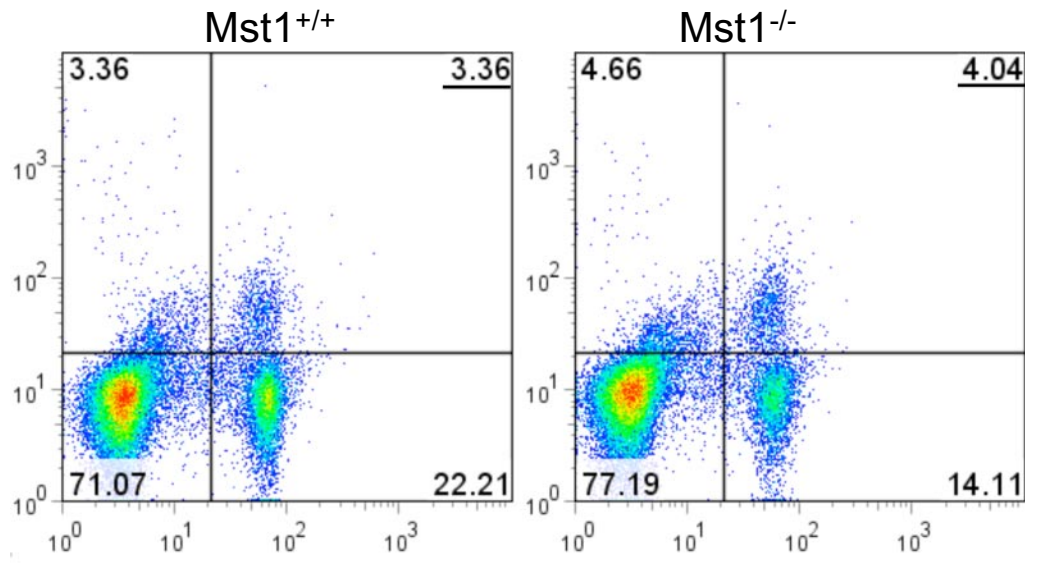

Lymph node

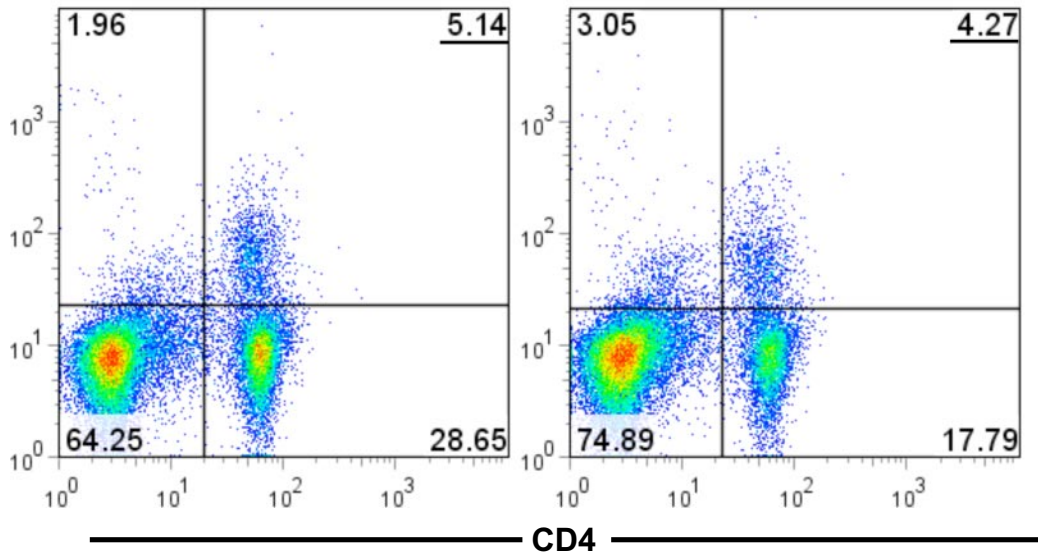

CD4

**Fig. S6.** The relative abundance of CD4<sup>+</sup>/Foxp3<sup>+</sup> cells in secondary lymphoid organs of Mst1-null and wild-type mice. Representative dot plots of cells isolated from spleen and lymph nodes of Mst1-null and wild-type mice, stained with antibodies to CD4, and Foxp3 and analyzed by flow cytometry.
